# Supplementary material
Source: HighWire-hosted journal article supplement (http://bmjopenquality.bmj.com/highwire/filestream/136016/field_highwire_adjunct_files/0/ds4723.pdf)
Supplement: ds4723.pdf [file ds4723.pdf]

## Percentage of HDSs in one week with correct advice following each intervention

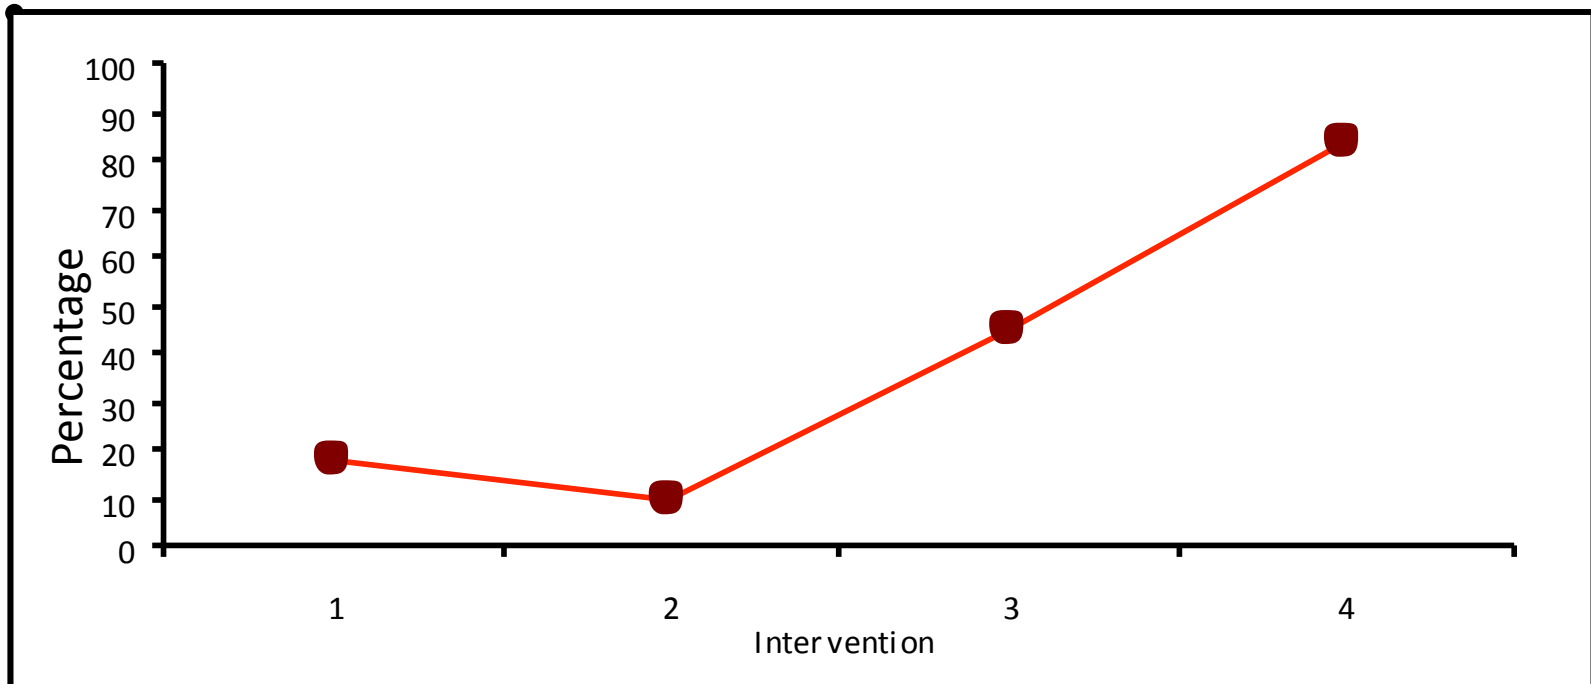

Intervention:

1. Baseline (18%)
2. Template on ward (10%)
3. Teaching session (45%)
4. E-template uploaded and section made compulsory (84%)
